# Supplementary material for: School-Based Interventions in Low Socioeconomic Settings to Reduce Obesity Outcomes among Preschoolers: A Scoping Review
Source: MDPI journal article supplement (doi:10.3390/nu11071518), 2019-07-04
Supplement: s1 [file s1]

## Supplementary Table

Table S1. Search strategy.

| Source                        | PubMed/Medline                                                                                                                                                                                                                                                                                                                                                                                                                                                                                                                                                                                                                                                                                                                                                                                                                                                                                                                                                                                                    | Food Science Source                                                                                                                                                                                                                                                                                                                                                                                                                                                                                                                       | ERIC                        | Gray Literature Search                                                                                                                                         |
|-------------------------------|-------------------------------------------------------------------------------------------------------------------------------------------------------------------------------------------------------------------------------------------------------------------------------------------------------------------------------------------------------------------------------------------------------------------------------------------------------------------------------------------------------------------------------------------------------------------------------------------------------------------------------------------------------------------------------------------------------------------------------------------------------------------------------------------------------------------------------------------------------------------------------------------------------------------------------------------------------------------------------------------------------------------|-------------------------------------------------------------------------------------------------------------------------------------------------------------------------------------------------------------------------------------------------------------------------------------------------------------------------------------------------------------------------------------------------------------------------------------------------------------------------------------------------------------------------------------------|-----------------------------|----------------------------------------------------------------------------------------------------------------------------------------------------------------|
| <b>Platform details</b>       | PubMed                                                                                                                                                                                                                                                                                                                                                                                                                                                                                                                                                                                                                                                                                                                                                                                                                                                                                                                                                                                                            | EBSCO                                                                                                                                                                                                                                                                                                                                                                                                                                                                                                                                     | EBSCO                       | PubMed                                                                                                                                                         |
| <b>Search Limits applied</b>  | None                                                                                                                                                                                                                                                                                                                                                                                                                                                                                                                                                                                                                                                                                                                                                                                                                                                                                                                                                                                                              | None                                                                                                                                                                                                                                                                                                                                                                                                                                                                                                                                      | None                        | None                                                                                                                                                           |
| <b>Final Search String(s)</b> | <p>(program* OR intervent* OR educat* OR prevent* OR promot*)</p> <p>AND ("obesity"[MeSH Terms] OR "obesity"[tiab] OR "obese"[tiab] OR "exercise"[MeSH Terms] OR "exercise"[tiab] OR fitness[tiab] OR "physical activity"[tiab] OR "overweight"[MeSH Terms] OR "overweight"[tiab] OR "over weight"[tiab] OR "body mass index"[tiab] OR BMI[tiab] OR "weights and measures"[MeSH Terms] OR "weight"[tiab] OR "body weight"[MeSH Terms] OR "body weight"[tiab] OR "waist circumference"[tiab] OR "diet"[MeSH Terms] OR "diet"[tiab] OR sedentary[tiab] OR "health"[MeSH Terms] OR "health"[tiab] OR "wellness"[tiab] OR "nutritional status"[MeSH Terms] OR "nutritional status"[tiab] OR "nutrition"[tiab] OR "nutritional sciences"[MeSH Terms] OR "nutritional sciences"[tiab] OR "body fat"[tiab] OR "feeding behavior"[tiab] OR "health behavior"[tiab] OR "life style"[tiab] OR "physical education and training"[tiab] OR "motor activity"[tiab] OR "movement"[MeSH Terms] OR "movement"[tiab] OR "Child</p> | <p>(program* OR intervent* OR educat* OR prevent* OR promot*)</p> <p>AND (obes* OR exercise OR fitness OR "physical activity" OR overweight OR "over weight" OR over-weight OR "body mass index" OR BMI OR weight OR "waist circumference" OR diet OR sedentary OR health OR wellness OR nutrition OR nutritional OR "body fat" OR "feeding behavior" OR "health behavior" OR food OR fruit OR drink OR vegetable OR "physical education" OR "motor activity" OR movement OR "life style" OR "physical health" OR "body composition")</p> | Same as Food Science Source | Searched citations from the original 13 primary sources. Eligible studies were found from two original citations: Fitzgibbon et al. 2011 and Burgi et al. 2012 |

|                                           |                                                                                                                                                                                                                                                                                                                                                                                                                                                                                                                                                                                                                                                                                                                   |                                                                                                                                                                                                                                                                                                                                                                                |              |                 |
|-------------------------------------------|-------------------------------------------------------------------------------------------------------------------------------------------------------------------------------------------------------------------------------------------------------------------------------------------------------------------------------------------------------------------------------------------------------------------------------------------------------------------------------------------------------------------------------------------------------------------------------------------------------------------------------------------------------------------------------------------------------------------|--------------------------------------------------------------------------------------------------------------------------------------------------------------------------------------------------------------------------------------------------------------------------------------------------------------------------------------------------------------------------------|--------------|-----------------|
|                                           | <p>Nutrition Sciences"[tiab] OR "drinking"[MeSH Terms] OR "drinking"[tiab] OR "food"[MeSH Terms] OR "food"[tiab] OR "fruit"[MeSH Terms] OR "fruit"[tiab] OR "vegetables"[MeSH Terms] OR "vegetables"[tiab])</p> <p>AND (rural OR underserved OR "under served" OR under-served OR non-urban OR "non urban" OR underdeveloped OR under-developed OR "under developed" OR "low socioeconomic status" OR "Socioeconomic Factors" OR "Socioeconomic Factors")</p> <p>AND (preschool[Title/Abstract] OR preschool[Title/Abstract] OR "pre school"[Title/Abstract] OR "child, preschool"[MeSH Terms] OR toddler[Title/Abstract] OR "child development center"[Title/Abstract] OR "early childhood"[Title/Abstract])</p> | <p>AND (rural OR underserved OR "under served" OR under-served OR non-urban OR "non urban" OR underdeveloped OR under-developed OR "under developed" OR "low socioeconomic status" OR "Socioeconomic Factors" OR disadvantaged)</p> <p>AND (preschool OR preschool OR "pre school" OR toddler OR "child development centers" OR "early childhood" OR "preschool children")</p> |              |                 |
| <b>Date of search</b>                     | 2 April 2019                                                                                                                                                                                                                                                                                                                                                                                                                                                                                                                                                                                                                                                                                                      | 2 April 2019                                                                                                                                                                                                                                                                                                                                                                   | 2 April 2019 | 5 February 2019 |
| <b># records retrieved before de-dup.</b> | 12381                                                                                                                                                                                                                                                                                                                                                                                                                                                                                                                                                                                                                                                                                                             | 402                                                                                                                                                                                                                                                                                                                                                                            | 1468         | 2               |
